# Supplementary material
Source: PubMed Central journal article supplement (PMC8011649)
Supplement: NIHMS1622078-supplement-1622078_Supp_Tab4.pdf [file NIHMS1622078-supplement-1622078_Supp_Tab4.pdf]

## Supplemental information

### Chemico-genetic discovery of astrocyte control of inhibition *in vivo*

**Tetsuya Takano<sup>1\*</sup>, John Wallace<sup>1</sup>, Katherine T. Baldwin<sup>1</sup>, Alicia Purkey<sup>1</sup>, Akiyoshi Uezu<sup>1</sup>, Jamie L. Courtland<sup>2</sup>, Erik J. Soderblom<sup>1,3</sup>, Tomomi Shimogori<sup>4</sup>, Patricia F. Maness<sup>5</sup>, Cagla Eroglu<sup>1,2\*</sup>, Scott H. Soderling<sup>1,2\*</sup>**

1. The Department of Cell Biology, Duke University Medical School, Durham, NC 27710, USA
2. Department of Neurobiology, Duke University Medical School, Durham, NC, 27710, USA
3. Duke Proteomics and Metabolomics Shared Resource and Duke Center for Genomic and Computational Biology, Duke University Medical School, Durham, NC, 27710, USA
4. Molecular Mechanisms of Brain Development, Center for Brain Science (CBS), RIKEN, Saitama 351-0198, Japan
5. Departments of Biochemistry and Biophysics and, University of North Carolina School of Medicine, Chapel Hill, North Carolina 27599, USA

\*Corresponding authors;

Scott H. Soderling, Ph.D.  
Professor and Chair of Cell Biology  
Professor of Neurobiology  
Duke University Medical Center  
Email: [scott.soderling@duke.edu](mailto:scott.soderling@duke.edu)

Cagla Eroglu, Ph.D.  
Associate Professor  
Departments of Cell Biology and Neurobiology  
Duke University Medical Center  
Email: [cagla.eroglu@duke.edu](mailto:cagla.eroglu@duke.edu)

Tetsuya Takano, Ph.D.  
Departments of Cell Biology  
Duke University Medical Center  
Email: [tetsuya.takano@duke.edu](mailto:tetsuya.takano@duke.edu)

# Supplementary Figure 1

**Fig. 4a**

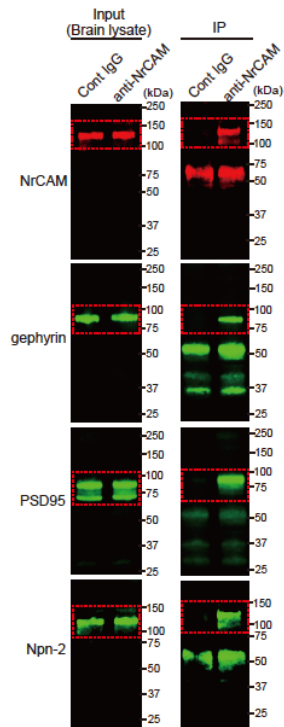

**Ext. Data Fig. 1b**

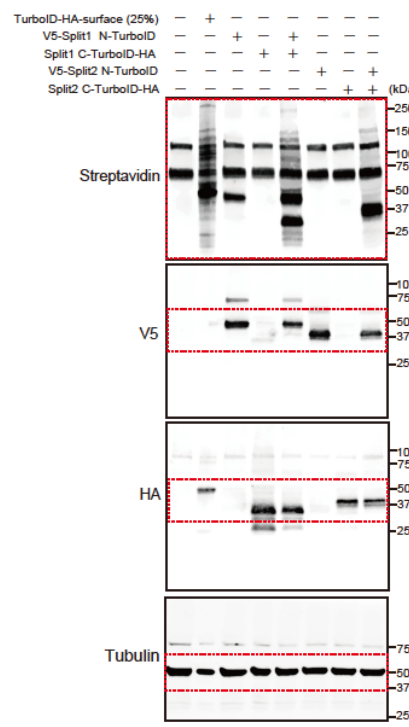

**Ext. Data Fig. 4a**

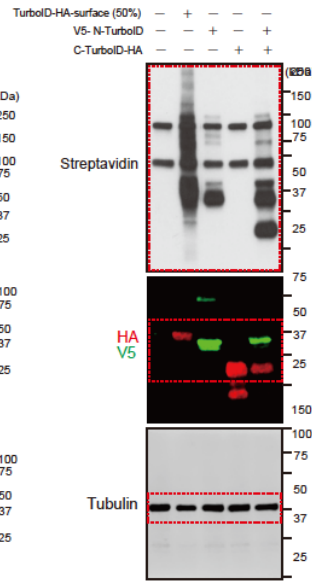

**Ext. Data Fig. 5b**

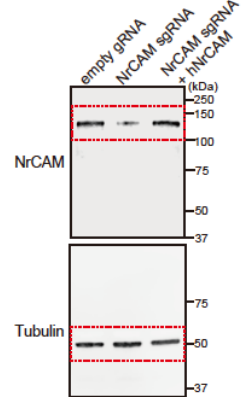

**Ext. Data Fig. 6b**

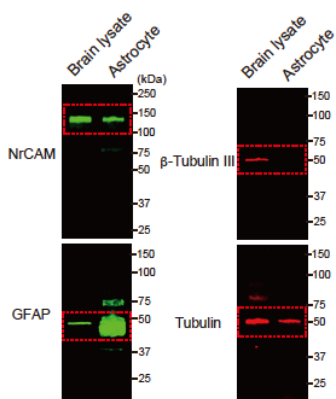

**Ext. Data Fig. 7c**

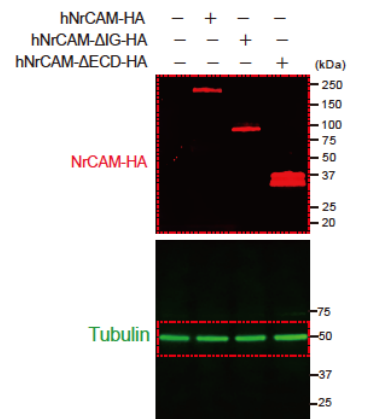

**Ext. Data Fig. 8a**

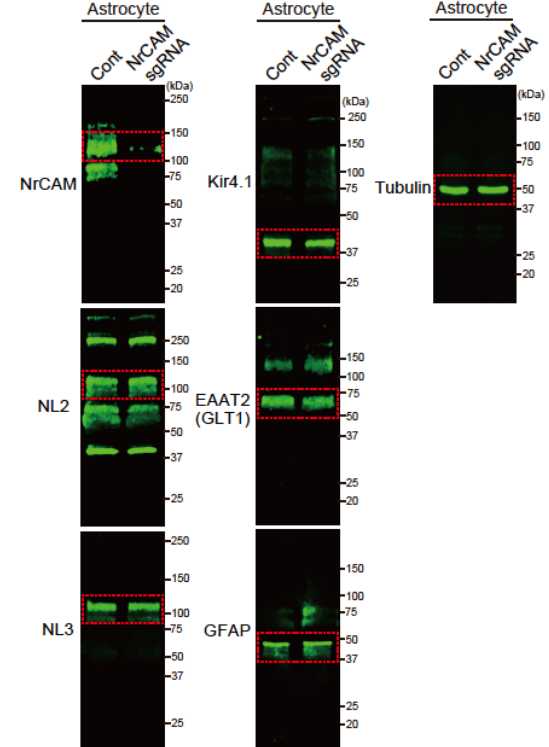

**Ext. Data Fig. 8c**

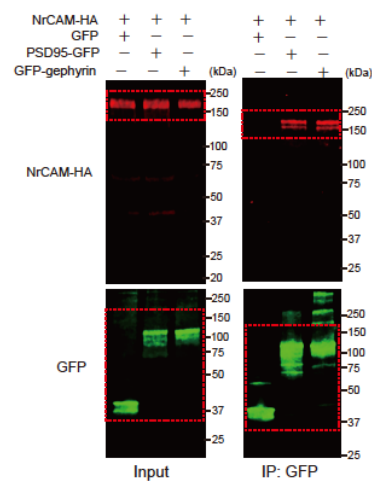

**Supplementary Table 4: Primers used for constructions or sequences**

|                                                       | Primers                                                                                                       |
|-------------------------------------------------------|---------------------------------------------------------------------------------------------------------------|
| pZac-GfaABC1D-TurboID-HA                              | Forward 5'-GAGAATTCACCATGAAAGACAATACTGTGCCTCTGAAGCT-3'<br>Reverse 5'-TTTACCCTTACGATGTACCGGATTACGCATCTAGAGT-3' |
| pZac-GfaABC1D-TurboID-HA<br>Sequence primer 1         | 5'-AATTACAGCTCTTAAGGCTAGAGTACTTAA-3'                                                                          |
| pZac-GfaABC1D-TurboID-HA<br>Sequence primer 2         | 5'-TAACCATTATAAGCTGCAATAAACAAGTTAA-3'                                                                         |
| pZac-GfaABC1D-TurboID-HA-surface                      | Forward 5'-GCGTTTAAACAAAGACAATACTGTGCTGTGCCTCTGAA-3'<br>Reverse 5'-TCTAGACTACAGAGAAATGAAGTCCAGGGCTTGGAGGA-3'  |
| pZac-GfaABC1D-TurboID-HA-surface<br>Sequence primer 1 | 5'-AATTACAGCTCTTAAGGCTAGAGTACTTAA-3'                                                                          |
| pZac-GfaABC1D-TurboID-HA-surface<br>Sequence primer 2 | 5'-TTAATCCCTGCTTCTGCAGTGTGAT-3'                                                                               |
| pZac-GfaABC1D-TurboID-HA-surface<br>Sequence primer 3 | 5'-CCACTAGTTGCGTAATCCGGTACATCGTAA-3'                                                                          |
| pZac-GfaABC1D-TurboID-HA-surface<br>Sequence primer 4 | 5'-TTAACTTGTTTATTGCAGCTTATAATGGTTA-3'                                                                         |
| AAV-hSynI-V5-Split 1<br>N-TurboID                     | Forward 5'-GCGTTTAAACGGCAAGCCCATCCCCAACCC-3'<br>Reverse 5'-CCACTAGTTTCTGCTCGAACAGTTCAGGGC-3'                  |
| pZac-GfaABC1D-Split 1<br>C-TurboID-HA                 | Forward 5'-GCGTTTAAACGGCCTGGCTCCATATCTGCCAC-3'<br>Reverse 5'-CCACTAGTTGCGTAATCCGGTACATCGTAA-3'                |
| AAV-hSynI-V5-Split 2<br>N-TurboID                     | Forward 5'-CGTTTAAACGGCAAGCCCATCCCCAACCCC-3'<br>Reverse 5'-CACTAGTCTTCAGGCGCCAAAACATACTCAGGTA-3'              |

|                                                                                                   |                                                                                                                                                                     |
|---------------------------------------------------------------------------------------------------|---------------------------------------------------------------------------------------------------------------------------------------------------------------------|
| pZac-GfaABC1D-Split 2<br>C-TurboID-HA                                                             | Forward 5'-GCGTTTAAACCGGGACCAGCAGCAATCGG-3'<br><br>Reverse 5'-CACTAGTTGCGTAATCCGGTACATCGTAAGGGTAAA-3'                                                               |
| AAV-hSynI-V5-Split 1<br>N-TurboID<br>AAV-hSynI-V5-Split 2<br>N-TurboID<br>Sequence primer         | 5'-TCAGCACTGAAGGCGCGCTGACGTCA-3'                                                                                                                                    |
| pZac-GfaABC1D-Split 1<br>C-TurboID-HA<br>pZac-GfaABC1D-Split 2<br>C-TurboID-HA<br>Sequence primer | 5'-AATTACAGCTCTTAAGGCTAGAGTACTTAA-3'                                                                                                                                |
| AAV-U6sgRNA-<br>GfaABC1D-Cre                                                                      | Forward 5'-TTTTTTTCTAGAAGATCTAACATATCCTGGTGTGGAG-3'<br><br>Reverse 5'-TGGCGGTACCTGCGAGCAGCGGA-3'                                                                    |
| AAV-U6sgRNA-<br>GfaABC1D-Cre<br>Sequence primer                                                   | 5'-ATGAGATTTTCTGACCTCATCGCT-3'                                                                                                                                      |
| AAV-Ef1a-hNrCAM-HA                                                                                | Forward 5'-TACCGGATCCTCTAGAACCATGCAGCTTAAAATAATGCCGAAAAA-3'<br><br>Reverse 5'-<br>CGATAAGCTTGATATCTTATGCGTAATCCGGTACATCGTAAGGGTAAAGAACAAAGGAAT<br>TCAT-3'           |
| AAV-Ef1a-hNrCAM-<br>ΔIG-HA                                                                        | Forward 5'-TACCGGATCCTCTAGAACCATGACTCCAGCTCCCGTTTACGATGT-3'<br><br>Reverse 5'-<br>CGATAAGCTTGATATCTTATGCGTAATCCGGTACATCGTAAGGGTAAAGAACAAAGGAAT<br>TCATGGCGTTGACA-3' |
| AAV-Ef1a-hNrCAM-<br>ΔECD-HA                                                                       | Forward 5'-TACCGGATCCTCTAGAACCATGGATGAAGCTGGTATTCTTCCA-3'<br><br>Reverse 5'-<br>CGATAAGCTTGATATCTTATGCGTAATCCGGTACATCGTAAGGGTAAAGAACAAAGGAAT<br>TCATGGCGTTGACA-3'   |

|                                      |                                                                                                                                                                 |
|--------------------------------------|-----------------------------------------------------------------------------------------------------------------------------------------------------------------|
| AAV-Ef1a-hNrCAM-Signal peptide       | Forward 5'-AGGTGTCGTGAGGTACCACCATGCAGCTTAAAATAAT-3'<br>Reverse 5'-TGGAGTCATGGTTCTAGAGCACAGGAAGAGAAT-3'                                                          |
| AAV-Ef1a-hNrCAM-HA Sequence primer 1 | 5'-ATTAGTTCTCGAGCTTTTGGAGTA-3'                                                                                                                                  |
| AAV-Ef1a-hNrCAM-HA Sequence primer 2 | 5'-TAGATTTAATCATACTCAAACCATACAGCAGAA-3'                                                                                                                         |
| AAV-Ef1a-hNrCAM-HA Sequence primer 3 | 5'-TTTAAAGGAGCTAAAGGAAGTGCTCTTCAT-3'                                                                                                                            |
| AAV-Ef1a-hNrCAM-HA Sequence primer 4 | 5'-AAATGTATCCAAATATATTGTCTCAGGCA-3'                                                                                                                             |
| AAV-GfaABC1D-hNrCAM-HA               | Forward 5'-ATAGGCTAGCCTCGAGACCATGCAGCTTAAAATAATGCCGAAAAA-3'<br>Reverse 5'-<br>TCTGCTCGAAGCGGCCGCTTATGCGTAATCCGGTACATCGTAAGGGTAAAGAACAAAGG<br>AATTCAT-3'         |
| AAV-GfaABC1D-hNrCAM-ΔIG-HA           | Forward 5'-ATAGGCTAGCCTCGAGACCATGACTCCAGCTCCCGTTTACGAT-3'<br>Reverse 5'-<br>TCTGCTCGAAGCGGCCGCTTATGCGTAATCCGGTACATCGTAAGGGTAAAGAACAAAGG<br>AATTCATGGCGTTGACA-3' |
| AAV-GfaABC1D-hNrCAM-ΔECD-HA          | Forward 5'-ATAGGCTAGCCTCGAGACCATGGATGAAGCTGGTATTCTTCCA-3'<br>Reverse 5'-<br>TCTGCTCGAAGCGGCCGCTTATGCGTAATCCGGTACATCGTAAGGGTAAAGAACAAAGG<br>AATTCATGGCGTTGACA-3' |
| AAV-GfaABC1D-hNrCAM-Signal peptide   | Forward 5'-AGGCTAGCACCATGCAGCTTAAAATAAT-3'<br>Reverse 5'-TGGAGTCATGGTCTCGAGGCACAGGAAGAGAATCA-3'                                                                 |

|                                                 |                                            |
|-------------------------------------------------|--------------------------------------------|
| AAV-GfaABC1D-<br>hNrCAM-HA<br>Sequence primer 1 | 5'-TATCAAGGTTACAAGACAGGTTTAAGGAGACCAATA-3' |
| AAV-GfaABC1D-<br>hNrCAM-HA<br>Sequence primer 2 | 5'-TAGATTTAATCATACTCAAACCATACAGCAGAA-3'    |
| AAV-GfaABC1D-<br>hNrCAM-HA<br>Sequence primer 3 | 5'-TTTAAAGGAGCTAAAGGAAGTGCTCTTCAT-3'       |
| AAV-GfaABC1D-<br>hNrCAM-HA<br>Sequence primer 4 | 5'-AAATGTATCCAAATATATTGTCTCAGGCA-3'        |
